# Supplementary material for: The Reliability of Neuromuscular and Perceptual Measures Used to Profile Recovery, and the Time-Course of Such Responses Following Academy Rugby League Match-Play
Source: MDPI journal article supplement (doi:10.3390/sports8050073), 2020-05-22
Supplement: s1 [file s1]

# Supplementary Materials: The Reliability of Neuromuscular and Perceptual Measures used to profile Recovery, and the Time-Course of such Responses following Academy Rugby League Match-Play

Hendrickus G.J. Aben, Samuel P. Hills, Darren Higgins, Carlton B. Cooke, Danielle Davis, Ben Jones and Mark Russell \*

**Table S1.** Wellness questionnaire

|                                    | 1                             | 2                              | 3                                                      | 4                     | 5                  |
|------------------------------------|-------------------------------|--------------------------------|--------------------------------------------------------|-----------------------|--------------------|
| Fatigue                            | Always tired                  | More tired than normal         | Normal                                                 | Fresh                 | Very fresh         |
| Sleep Quality                      | Insomnia                      | Restless sleep                 | Difficulty falling asleep                              | Good                  | Very restful       |
| General Upper Body Muscle Soreness | Very Sore                     | Increase in soreness/tightness | Normal                                                 | Feeling good          | Feeling great      |
| General Lower Body Muscle Soreness | Very Sore                     | Increase in soreness/tightness | Normal                                                 | Feeling good          | Feeling great      |
| Stress Level                       | Highly stressed               | Feeling stressed               | Normal                                                 | Relaxed               | Very relaxed       |
| Mood                               | Highly annoyed/irritable/down | Aggravated/short tempered      | Less interested in others and/or activities than usual | A generally good mood | Very positive mood |

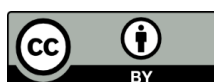

© 2020 by the authors. Licensee MDPI, Basel, Switzerland. This article is an open access article distributed under the terms and conditions of the Creative Commons Attribution (CC BY) license (<http://creativecommons.org/licenses/by/4.0/>).
